# Supplementary material for: Similar performance of liver stiffness measurement and liver surface nodularity for the detection of portal hypertension in patients with hepatocellular carcinoma
Source: PubMed Central journal article supplement — JHEP Rep. 2020 Jul 17;2(5):100147. doi: 10.1016/j.jhepr.2020.100147 (PMC7452899; doi:10.1016/j.jhepr.2020.100147), 2020-07-17
Supplement: mmc1.pdf [file mmc1.pdf]

**Similar performance of liver stiffness measurement and liver surface nodularity for the detection of portal hypertension in patients with hepatocellular carcinoma**

Alexandra Souhami, Riccardo Sartoris, Pierre-Emmanuel Rautou, François Cauchy, Mohamed Bouattour, François Durand, Valerio Gianelli, Elia Gigante, Laurent Castera, Dominique Valla, Olivier Soubrane, Valérie Vilgrain, Maxime Ronot

Table of contents

|                            |   |
|----------------------------|---|
| Supplementary methods..... | 2 |
| Table S1.....              | 3 |
| Table S2.....              | 4 |
| Table S3.....              | 5 |
| Table S4.....              | 6 |
| Fig. S1.....               | 7 |

## Supplementary methods

### Calibration of the two-step algorithm

The two-step algorithm is not a linear model *per se*. Indeed, the algorithm provides three possible outputs:

- no CSPH
- inconclusive
- CSPH

Therefore, no calibration plot can be provided.

Nevertheless, adopting a different approach, we performed a multiple linear regression using HVPHG as continuous dependent variable, and LSN and LSPS as variables in the model.

The resulting equation for 'predicting HVPHG' is:

$$\text{Predicted HVPG} = 3.83 \cdot \text{LSN} + 0.97 \cdot \text{LSPS} - 3.94.$$

This model is well calibrated (goodness of fit  $p=0.52$ ), as shown by the following plots.

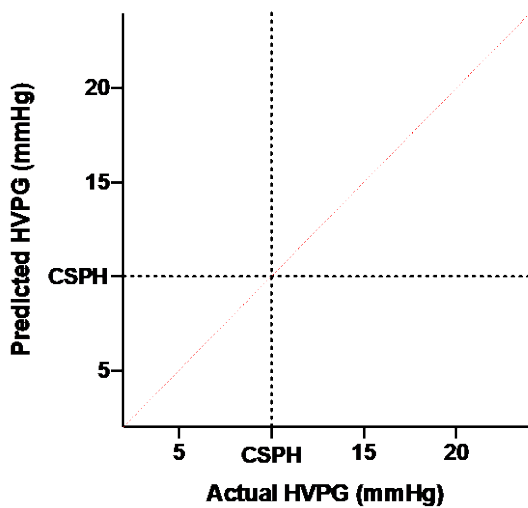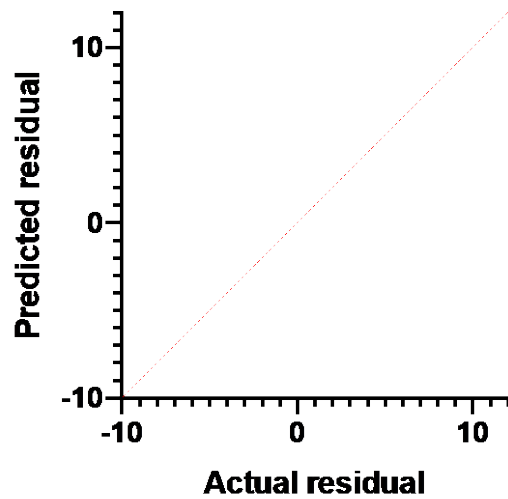

**Table S1. Per-protocol study population (n=122)**

|                                                    | <b>Total<br/>(n=122)</b> | <b>No CSPH<br/>(n=86)</b> | <b>CSPH<br/>(n=36)</b> | <b>P<br/>Value</b> |
|----------------------------------------------------|--------------------------|---------------------------|------------------------|--------------------|
| <b>Gender (%)</b>                                  |                          |                           |                        |                    |
| <i>Male</i>                                        | 91 (75%)                 | 61 (71%)                  | 30 (83%)               | .15                |
| <i>Female</i>                                      | 31 (25%)                 | 25 (29%)                  | 6 (17%)                | .15                |
| <b>Mean Age ± SD</b>                               |                          |                           |                        |                    |
| <i>Overall</i>                                     | 63 ± 10                  | 63 ± 10                   | 62 ± 9                 | .56                |
| <i>Male</i>                                        | 61 ± 10                  | 62 ± 10                   | 61 ± 10                | .84                |
| <i>Female</i>                                      | 67 ± 7                   | 67 ± 8                    | 67 ± 4                 | .94                |
| <b>BMI (kg/m<sup>2</sup>)</b>                      | 27.3 ± 5.0               | 27.3 ± 5.3                | 27.3 ± 4.0             | 1.0                |
| <b>Child-Pugh score (%)</b>                        |                          |                           |                        |                    |
| <i>A</i>                                           | 117 (96)                 | 84 (98)                   | 34 (95)                | 0.58               |
| <i>B</i>                                           | 5 (4)                    | 2 (2)                     | 2 (5)                  |                    |
| <b>Duration between HPVG-LSM and CT<br/>(days)</b> | 15 ± 11                  | 15 ± 12                   | 14 ± 10                | .66                |
| <b>HVPG (mm Hg)</b>                                | 8 ± 4                    | 6 ± 2                     | 14 ± 3                 | <.001              |
| <b>Hepatocellular carcinoma</b>                    |                          |                           |                        |                    |
| <i>Mean size ± SD (mm)</i>                         | 50 ± 27                  | 56 ± 28                   | 37 ± 19                | <0.001             |
| <i>Right Liver</i>                                 | 92 (75)                  | 65 (76)                   | 27 (75)                | 0.52               |
| <i>Left Liver</i>                                  | 20 (25)                  | 31 (24)                   | 9 (25)                 |                    |
| <b>Laboratory</b>                                  |                          |                           |                        |                    |
| <i>INR</i>                                         | 1.1 ± 0.1                | 1.1 ± 0.1                 | 1.2 ± 0.1              | <.001              |
| <i>Serum creatinin (μmol/L)</i>                    | 80 ± 18                  | 81 ± 21                   | 78 ± 13                | .46                |
| <i>Serum bilirubin (μmol/L)</i>                    | 14 ± 6                   | 14 ± 7                    | 15 ± 5                 | .57                |
| <i>Platelet count (G/L)</i>                        | 193 ± 59                 | 213 ± 60                  | 146 ± 36               | <.001              |
| <i>Serum albumin (g/L)</i>                         | 38 ± 6                   | 39 ± 6                    | 35 ± 7                 | <.001              |
| <i>Serum AST (x ULN)</i>                           | 1.9 ± 1.3                | 1.6 ± 0.8                 | 1.7 ± 2.5              | .74                |
| <i>Serum ALT (x ULN)</i>                           | 1.4 ± 0.9                | 1.3 ± 0.8                 | 1.5 ± 0.9              | .24                |
| <i>γ-glutamyl transferase (x ULN)</i>              | 3.2 ± 2.6                | 3.0 ± 2.4                 | 3.7 ± 2.0              | .20                |
| <i>Alcaline phosphatase (x ULN)</i>                | 1.2 ± 0.7                | 1.1 ± 0.6                 | 1.5 ± 1.0              | .01                |
| <b>Non-invasive tests</b>                          |                          |                           |                        |                    |
| <i>Liver surface nodularity</i>                    | 2.69 ± 0.4               | 2.5 ± 0.3                 | 3.15 ± 0.4             | <.001              |
| <i>Largest spleen size (cm)</i>                    | 11.5 ± 1.6               | 11.1 ± 1.4                | 12.6 ± 1.4             | <.001              |
| <i>Platelets/spleen size</i>                       | 17.6 ± 6.6               | 19.9 ± 6.5                | 12.2 ± 4.0             | <.001              |
| <i>LSM kPa median (range)</i>                      | 14.1 (3.2-75.0)          | 10.6 (3.2-75.0)           | 29.5 (8.8-75.0)        | <.001              |
| <i>LSPS</i>                                        | 1.80 ± 1.50              | 1.07 ± 0.78               | 3.52 ± 2.06            | <.001              |

AST/ALT aspartate aminotransferase/alanin aminotransferase; CSPH: Clinically significant portal hypertension; BMI: Body mass index; HVPG: hepatic venous pressure gradient; LSM: Liver stiffness measurement; CT: computed tomography; INR: international normalized ratio ; LSPS: Liver stiffness\*spleen size/platelet count. Values are expressed as mean and standard deviation unless specified.

**Table S2. Comparison of included (n=140) and excluded (n=147) patients. Excluded patients did not undergo transient elastography for Liver stiffness Measurement or CT examination within 30 days before or after the Hepatic Venous Pressure Gradient measurement.**

|                                            | Included<br>(n=140) | Excluded<br>(n=147) | P<br>Value  |
|--------------------------------------------|---------------------|---------------------|-------------|
| <b>Gender (%)</b>                          |                     |                     |             |
| <i>Male</i>                                | 109 (78)            | 109 (74)            | .43         |
| <i>Female</i>                              | 31 (22)             | 38 (26)             |             |
| <b>Mean Age ± SD</b>                       |                     |                     |             |
| <i>Overall</i>                             | 63 ± 9              | 59 ± 11             | <b>.001</b> |
| <b>BMI (kg/m<sup>2</sup>)</b>              | 28.9 ± 6.9          | 27.1 ± 7.2          | .03         |
| <b>Child-Pugh score (%)</b>                |                     |                     |             |
| <i>A</i>                                   | 133 (95)            | 141 (96)            | .68         |
| <i>B</i>                                   | 7 (5)               | 6 (4)               |             |
| <b>Barcelona Clinic Liver Cancer stage</b> |                     |                     |             |
| <i>Stage 0</i>                             | 26 (19)             | 35 (24)             | .31         |
| <i>Stage A</i>                             | 114 (81)            | 112 (76)            |             |
| <b>Cause of cirrhosis*</b>                 |                     |                     |             |
| <i>Hepatitis C virus infection</i>         | 50 (36)             | 68 (46)             | <b>.009</b> |
| <i>Hepatitis B virus infection</i>         | 30 (21)             | 24 (16)             | .28         |
| <i>Alcohol</i>                             | 47 (34)             | 56 (38)             | .48         |
| <i>Nonalcoholic fatty liver disease</i>    | 25 (18)             | 15 (10)             | .05         |
| <b>HVPG (mmHg)</b>                         | 8 ± 4               | 9 ± 5               | .06         |
| <b>Laboratory</b>                          |                     |                     |             |
| <i>Platelet count (G/L)</i>                | 193 ± 58            | 179 ± 68            | .06         |
| <i>Serum albumin (g/L)</i>                 | 35 ± 7              | 34 ± 8              | .26         |
| <i>Serum AST (x ULN)</i>                   | 1.8 ± 1.1           | 1.7 ± 1.5           | .52         |
| <i>Serum ALT (x ULN)</i>                   | 1.6 ± 1.2           | 1.8 ± 1.6           | .23         |
| <i>γ-glutamyl transferase (x ULN)</i>      | 3.5 ± 2.9           | 3.4 ± 2.7           | .76         |
| <i>Alcaline phosphate (x ULN)</i>          | 1.2 ± 0.7           | 1.2 ± 0.4           | 1.0         |

AST/ALT aspartate aminotransferase/alanin aminotransferase; BMI: Body mass index; HVPG: hepatic venous pressure gradient; CT: computed tomography; ULN: upper limit of normal values. Values are expressed as mean and standard deviation unless specified.

\* some patients had several causes of cirrhosis

**Table S3. Analysis of the 92 patients who were not included in the previous study by Sartoris et al. [1]**

| <b>LSN</b>                  | <b>&lt; 2.5<br/>(N=26)</b> | <b>≥ 2.5 and &lt; 3.10<br/>(N=48)</b> | <b>≥ 3.10<br/>(N=20)</b> |
|-----------------------------|----------------------------|---------------------------------------|--------------------------|
| <b>No CSPH (N=66)</b>       | 26                         | 34                                    | 7                        |
| <b>CSPH (N=26)</b>          | 0                          | 12                                    | 13                       |
| <b>Correctly classified</b> | 26 (100%)                  |                                       | 13 (65%)                 |

LSN: Liver surface nodularity; CSPH: Clinically significant portal hypertension.

**Table S4.** LSN, LSM, and LSPS values according to the size and location of hepatocellular carcinoma and to the presence of CSPH in the 122 patients with available LSN, LSM and LSPS

| HCC location                   | LSN                   |                       |         | LSM (kPa)                 |                             |         | LSPS                  |                       |         |
|--------------------------------|-----------------------|-----------------------|---------|---------------------------|-----------------------------|---------|-----------------------|-----------------------|---------|
|                                | Left Liver<br>(N=30)  | Right Liver<br>(N=92) | P value | Left liver<br>(N=30)      | Right Liver<br>(N=92)       | P value | Left Liver<br>(N=30)  | Right Liver<br>(N=92) | P value |
| <b>Overall</b>                 | 2.68 ± 0.55           | 2.69 ± 0.52           | 0.91    | 10.6 (7.2-20.1)           | 14.4 (8.8-32.0)             | 0.06    | 1.38 ± 1.87           | 1.89 ± 2.10           | 0.24    |
| <i>HCC &lt; 10 cm</i>          | 2.68 ± 0.55<br>(n=30) | 2.73 ± 0.55<br>(n=79) | 0.58    | 10.6 (7.2-20.1)<br>(n=30) | 10.5 (6.8-15.9)<br>(N=79)   | 0.36    | 1.38 ± 1.87<br>(n=30) | 1.72 ± 2.12<br>(N=79) | 0.46    |
| <i>HCC ≥ 10 cm</i>             | -                     | 2.44 ± 0.21<br>(n=13) | -       | -                         | 72.0 (38.3-75.0)<br>(N=13)  | -       | -                     | 2.88 ± 1.77<br>(N=13) | -       |
| <i>p-value &lt; vs. ≥ 10cm</i> | -                     | 0.061                 | -       | -                         | <b>&lt;0.001</b>            | -       | -                     | 0.07                  | -       |
| <b>CSPH (N=36)</b>             | 3.26 ± 0.49<br>(N=9)  | 3.11 ± 0.51<br>(N=27) | 0.45    | 27.0 (12.0-39.4)<br>(N=9) | 34.4 (19.1-52.3)<br>(N=27)  | 0.32    | 3.04 ± 2.77<br>(N=9)  | 3.68 ± 2.66<br>(N=27) | 0.53    |
| <i>HCC &lt; 10 cm</i>          | 3.26 ± 0.49<br>(N=9)  | 3.16 ± 0.52<br>(N=24) | 0.48    | 27.0 (12.0-39.4)<br>(N=9) | 31.6 (18.3-47.0)<br>(N=24)  | 0.37    | 3.04 ± 2.77<br>(N=9)  | 3.39 ± 2.48<br>(N=24) | 0.42    |
| <i>HCC ≥ 10 cm</i>             | -                     | 2.69 ± 0.10<br>(N=3)  | -       | -                         | 72.0 (20.5-75.0)<br>(n=3)   | -       | -                     | (N=3)                 | -       |
| <i>p-value &lt; vs. ≥ 10cm</i> | -                     | 0.10                  | -       | -                         | 0.24                        | -       | -                     | 0.85                  | -       |
| <b>No CSPH (N=86)</b>          | 2.43 ± 0.35<br>(N=21) | 2.52 ± 0.42<br>(N=65) | 0.38    | 8.0 (6.9-15.6)<br>(N=21)  | 11.2 (6.9-19.9)<br>(N=65)   | 0.07    | 0.68 ± 0.49<br>(N=21) | 1.20 ± 1.28<br>(N=65) | 0.07    |
| <i>HCC &lt; 10 cm</i>          | 2.43 ± 0.35<br>(N=21) | 2.55 ± 0.45<br>(N=55) | 0.31    | 8.0 (6.9-15.6)<br>(N=21)  | 10.5 (6.8-15.9)<br>(N=55)   | 0.52    | 0.68 ± 0.49<br>(N=21) | 0.84 ± 0.82<br>(N=55) | 0.24    |
| <i>HCC ≥ 10 cm</i>             | -                     | 2.36 ± 0.18<br>(N=10) | -       | -                         | 72.80 (46.0-75.0)<br>(N=10) | -       | -                     | 2.72 ± 1.65<br>(N=10) | -       |
| <i>p-value &lt; vs. ≥ 10cm</i> | -                     | 0.22                  | -       | -                         | <b>&lt;0.001</b>            | -       | -                     | <b>&lt;0.001</b>      | -       |

HCC: Hepatocellular carcinoma; LSM: Liver Stiffness Measurement; LSN: Liver surface nodularity; LSPS: Liver stiffness\*spleen size/platelet count.  
CSPH: Clinically significant portal hypertension.

Significant p values are bold

LSM is provided as median and IQR, LSN and LSPS are provided as means and standard deviations

**Fig. S1. LSN, LSM and LSPS values according to the size and location of HCC, and to the presence of CSPH.**

Each graph plots LSN (A), LSM (B) and LSPS (C) values (y-axis) according to the size of HCC (x-axis). HCC location is represented by different forms. Presence of CSPH is shown by large forms, and absence of CSPH by small ones. Graph A shows that LSN values are not affected by the size or location of HCC, whatever the CSPH status. Graph B and C show that among patients with HCC  $\geq 10$ cm located in the right liver (n=13), a subset have high LSM ( $> 55$  kPa) and LSPS values ( $> 1.50$ ) (n=10, circle). In this subgroup, 8/10 (80%) patients without CSPH are misclassified as having CSPH.

HCC: Hepatocellular carcinoma; LSM: Liver Stiffness Measurement; LSN: Liver surface nodularity; LSPS: Liver stiffness\*spleen size/platelet count. CSPH: Clinically significant portal hypertension. Optimal cut-off values are shown by the horizontal dashed lines. Only the largest tumor per patient is considered here.

**Fig. S1A**

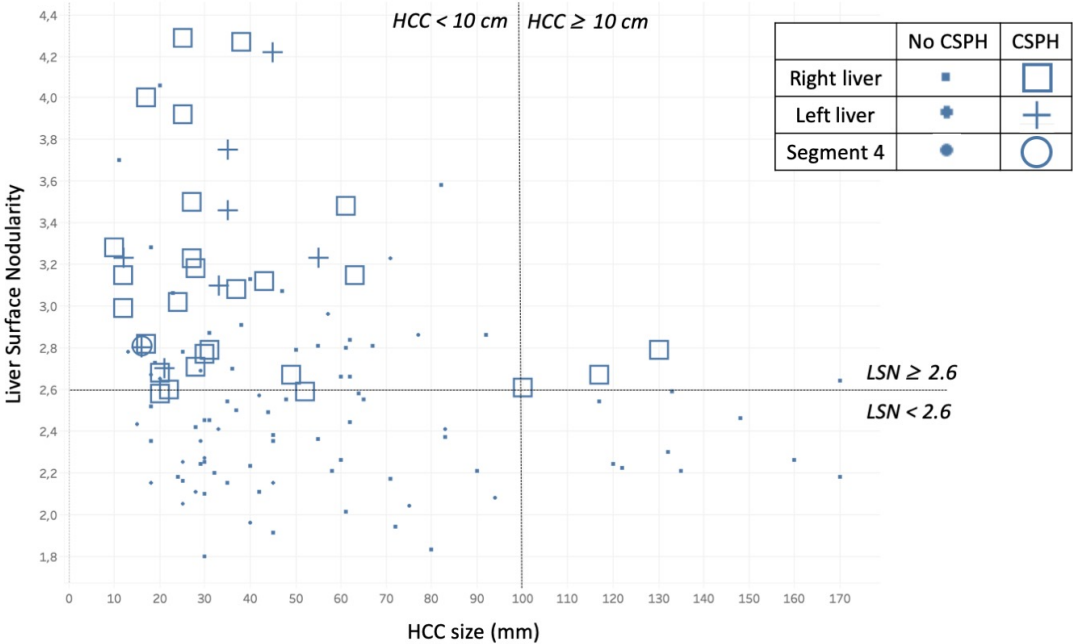

**Fig. S1B**

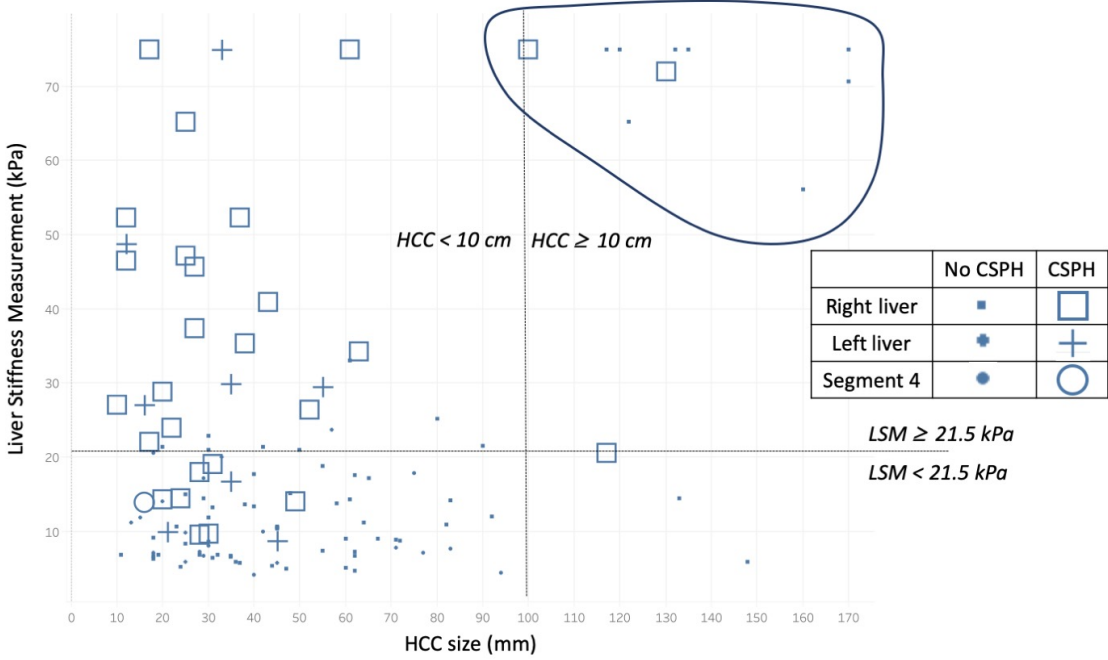

**Fig. S1C**

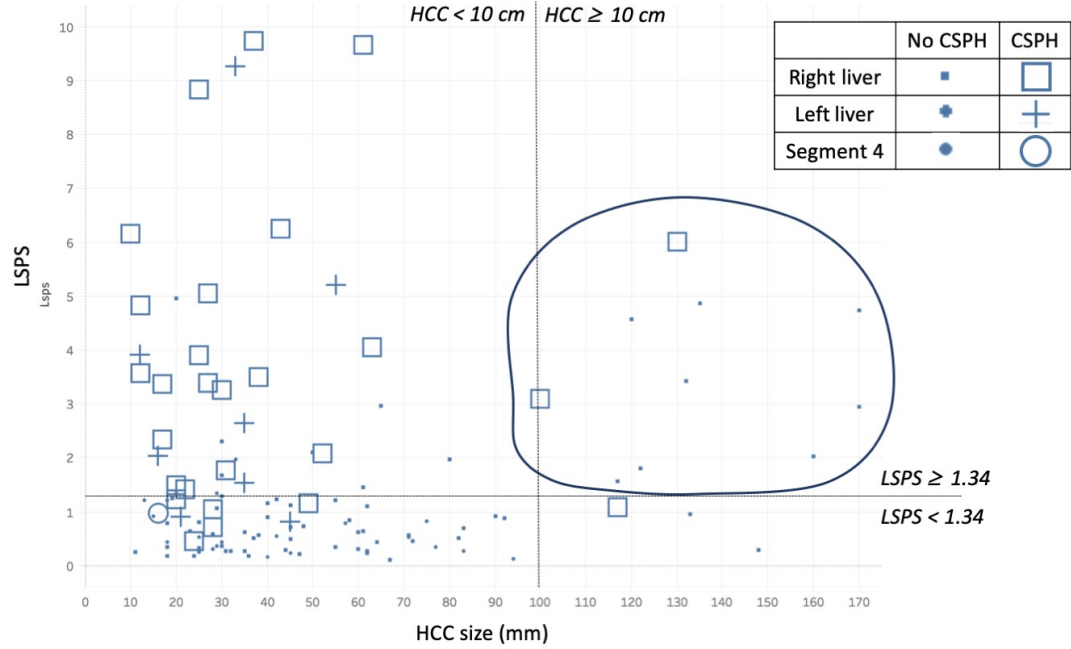



## REFERENCE

1. Sartoris R, Rautou PE, Elkrief L, Pollorsi G, Durand F, Valla D, et al. Quantification of Liver Surface Nodularity at CT: Utility for Detection of Portal Hypertension. *Radiology* 2018;289:698–707. doi:10.1148/radiol.2018181131.
