# Supplementary material for: Similar performance of liver stiffness measurement and liver surface nodularity for the detection of portal hypertension in patients with hepatocellular carcinoma
Source: PubMed Central journal article supplement — JHEP Rep. 2020 Jul 17;2(5):100147. doi: 10.1016/j.jhepr.2020.100147 (PMC7452899; doi:10.1016/j.jhepr.2020.100147), 2020-07-17
Supplement: mmc2.pdf [file mmc2.pdf]

## JHEP Reports

### CTAT methods

Tables for a “Complete, Transparent, Accurate and Timely account” (CTAT) are now mandatory for all revised submissions. The aim is to enhance the reproducibility of methods.

- Only include the parts relevant to your study
- Refer to the CTAT in the main text as ‘Supplementary CTAT Table’
- Do not add subheadings
- Add as many rows as needed to include all information
- Only include one item per row

If the CTAT form is not relevant to your study, please outline the reasons why:

|  |
|--|
|  |
|--|

#### 1.1 Antibodies

| Name | Citation | Supplier | Cat no. | Clone no. |
|------|----------|----------|---------|-----------|
| NA   |          |          |         |           |

#### 1.2 Cell lines

| Name | Citation | Supplier | Cat no. | Passage no. | Authentication test method |
|------|----------|----------|---------|-------------|----------------------------|
| NA   |          |          |         |             |                            |

#### 1.3 Organisms

| Name | Citation | Supplier | Strain | Sex | Age | Overall n number |
|------|----------|----------|--------|-----|-----|------------------|
| NA   |          |          |        |     |     |                  |

#### 1.4 Sequence based reagents

| Name | Sequence | Supplier |
|------|----------|----------|
| NA   |          |          |

#### 1.5 Biological samples

| Description | Source | Identifier |
|-------------|--------|------------|
| NA          |        |            |

#### 1.6 Deposited data

| Name of repository | Identifier | Link |
|--------------------|------------|------|
| NA                 |            |      |

#### 1.7 Software

Created : November, 2018

| Software name                     | Manufacturer         | Version      |
|-----------------------------------|----------------------|--------------|
| Liver Surface Nodularity Software | Liver Nodularity llc | version 0.88 |

## 1.8 Other (e.g. drugs, proteins, vectors etc.)

|    |  |  |
|----|--|--|
| NA |  |  |
|    |  |  |

## 1.9 Please provide the details of the corresponding methods author for the manuscript:

Prof. Maxime Ronot MD, PhD.  
Department of Radiology.  
Beaujon Hospital. AP-HP. 100 Boulevard du Général Leclerc. 92118 Clichy, France.  
E-mail: [maxime.ronot@aphp.fr](mailto:maxime.ronot@aphp.fr).  
Tel +33 1 4087 5566  
Fax +33 1 40 87 0548

## 2.0 Please confirm for randomised controlled trials all versions of the clinical protocol are included in the submission. These will be published online as supplementary information.

NA
